# Supplementary material for: Association of genetic variation with disproportionate vitamin A deficiency in pregnant women of certain ethnicities in the United States.
Source: Research Square preprint supplement (doi:10.21203/rs.3.rs-49188/v2), 2020-11-18
Supplement: Supplementary file 1 [file 08cb0f092dd973eaa47f2aaa.xlsx]

## Sheet: Supple_Table1
Supplementary Table 1: Refference allele frequency of vitamin A related SNPs
		1000 Genome								Population Architecture using Genomics and Epidemiology
id	Nearest Gene	African	American (Admixed American)	East Asian	Europe	South Asian	Global	Mean	SD	African American	Asian	Central American	Cuban	Dominican	Mexican	Native American	Native Hawaiian	Puerto Rican	South American	South Asian	Global	Mean	SD
rs9468304	ELOVL2	0.9546	0.648	0.372	0.8151	0.602	0.6981	0.67834	0.221142	0.92529	0.3671	0.6094	0.838	0.8665	0.55959	0.7194	0.4951	0.811	0.608	0.6	0.74759	0.672671	0.17355
rs946199	TCF7L2	0.5333	0.905	0.9524	0.8936	0.876	0.8085	0.83206	0.169394
rs911196	ELOVL2	0.9796	0.674	0.5437	0.8181	0.627	0.7482	0.72848	0.172121	0.94992	0.5326	0.6527	0.8465	0.8822	0.61721	0.7357	0.5816	0.8176	0.6468	0.643	0.79305	0.718712	0.136229
rs8043708	PKD1L2	0.8222	0.735	0.6121	0.8777	0.738	0.7626	0.757	0.100822
rs7755	CD36	0.8245	0.621	0.4722	0.5577	0.518	0.612	0.59868	0.137549
rs7501331	BCO1	0.9909	0.826	0.8125	0.7684	0.788	0.8478	0.83716	0.0887599	0.94775	0.8579	0.8441	0.8248	0.8796	0.83682	0.8103	0.7197	0.8233	0.8199	0.81	0.87728	0.834015	0.0550452
rs738409	PNPLA3	0.882	0.516	0.6498	0.7744	0.754	0.7378	0.71524	0.138555	0.85588	0.5649	0.5314	0.7148	0.7411	0.50083	0.7119	0.7325	0.66	0.5005	0.72	0.71354	0.657619	0.116531
rs7196470	BCO1	0.6271	0.893	0.5069	0.9344	0.731	0.7218	0.73848	0.179131
rs6834586	CXCL8	0.4145	0.898	0.9315	0.9513	0.853	0.779	0.80966	0.22402
rs6564851	BCO1	0.6589	0.465	0.1855	0.505	0.507	0.4762	0.46428	0.172539
rs6193257	SCARB1	0.9887	0.941	0.999	0.9056	0.975	0.9649	0.96186	0.0383169
rs5755368	ISX	0.7375	0.852	0.7798	0.7127	0.701	0.7498	0.7566	0.0612837	0.75671	0.7895	0.8332	0.7814	0.7698	0.82339	0.7992	0.8112	0.8057	0.8234	0.718	0.78368	0.791955	0.034073
rs4926340	RPE65	0.7965	0.952	0.9286	0.9483	0.96	0.9071	0.91708	0.0683895
rs4643493	APOB	0.9758	0.893	0.9831	0.8022	0.91	0.9181	0.91282	0.0733882	0.95393	0.9669	0.9003	0.8525	0.8835	0.88585	0.8587	0.9314	0.893	0.9057	0.915	0.92481	0.904253	0.0359334
rs3887137	ABCA1	0.9735	0.901	0.7014	0.8867	0.902	0.8772	0.87292	0.101685
rs3798709	ELOVL2	0.9796	0.674	0.5446	0.8181	0.627	0.7484	0.72866	0.17188
rs3536471	APOB	0.9576	0.875	0.9812	0.7545	0.83	0.8852	0.87966	0.0929218
rs2791952	ABCA1	0.0749	0.114	0.3304	0.0934	0.096	0.1396	0.14174	0.10637
rs2501175	SOD2	0.5983	0.183	0.3661	0.1561	0.198	0.3271	0.3003	0.185844	0.51759	0.3232	0.2114	0.227	0.3605	0.13622	0.2056	0.4704	0.2536	0.1872	0.21	0.36594	0.282065	0.122038
rs2278357	ABCG5	0.6377	0.695	0.881	0.8429	0.725	0.7528	0.75632	0.10229
rs202313	ISX	0.0076	0.21	0.1022	0.2266	0.079	0.1126	0.12508	0.0921495
rs1984112	CD36	0.7337	0.673	0.6438	0.6272	0.566	0.6532	0.64874	0.0615245
rs1869138	LIPC	0.9871	0.876	0.7917	0.8946	0.829	0.883	0.87568	0.074169
rs1800588	HL	0.4402	0.578	0.6002	0.7913	0.704	0.6136	0.62274	0.133085	0.50311	0.5041	0.4559	0.6908	0.5972	0.46327	0.6333	0.7693	0.6367	0.4798	0.732	0.5437	0.587771	0.112979
rs1761667	CD36	0.646	0.47	0.6935	0.4732	0.714	0.6096	0.59934	0.119196
rs1699482	ISX	0.7383	0.892	0.7738	0.8022	0.813	0.7941	0.80386	0.0571329	0.76858	0.7626	0.8673	0.8349	0.8036	0.86045	0.8421	0.8125	0.8541	0.8684	0.814	0.80423	0.82623	0.0373662
rs1667255	TTR	0.2489	0.542	0.6002	0.6243	0.577	0.4996	0.51848	0.153726	0.31043	0.6667	0.491	0.5083	0.4561	0.54709	0.5524	0.5993	0.4846	0.5373	0.591	0.45074	0.522202	0.0922571
rs1358594	CXCL8	0.5575	0.111	0.3313	0.0586	0.258	0.2913	0.26328	0.197676
rs1293492	BCO1	0.9107	0.68	0.872	0.5596	0.769	0.7728	0.75826	0.143074	0.83832	0.8463	0.7087	0.594	0.7226	0.68626	0.623	0.798	0.6601	0.719	0.759	0.76791	0.723207	0.0822131
rs1292654	BCO1	0.7216	0.473	0.1786	0.506	0.51	0.4932	0.47784	0.194174
rs1247620	CXCL8	0.9198	0.942	0.6835	0.9414	0.833	0.8628	0.86394	0.110374
rs1218585	RBP4	0.9017	0.872	0.9841	0.7714	0.887	0.885	0.88324	0.0760956
rs1218507	LIPC	0.854	0.89	0.7123	0.832	0.73	0.8019	0.80366	0.078365
rs1213913	RPE65	0.9962	0.914	0.8105	0.9066	0.866	0.904	0.89866	0.0682848
rs1185738	LIPC	0.9349	0.816	0.8869	0.7863	0.751	0.8429	0.83502	0.0749372	0.90282	0.8611	0.8837	0.7818	0.8393	0.86929	0.8302	0.7744	0.7986	0.8698	0.796	0.86257	0.837001	0.0440288
rs1099140	ABCA1	0.9803	0.889	0.6677	0.9264	0.928	0.8838	0.87828	0.122121
rs10882272	RBP4	0.354	0.713	0.8948	0.6193	0.581	0.6102	0.63242	0.197275	0.3953	0.8878	0.7122	0.5905	0.4976	0.74043	0.6429	0.8229	0.5451	0.7225	0.613	0.57439	0.651839	0.144142
rs1042031	APOB	0.8389	0.88	0.9554	0.7873	0.913	0.8722	0.87492	0.0650531	0.84576	0.9614	0.8796	0.8203	0.8265	0.86575	0.8349	0.921	0.856	0.89	0.908	0.86646	0.873565	0.0437577
SD: Standard deviation
